# Supplementary material
Source: Springer Nature journal article supplement (https://www.springermedizin.de/resource/supplementary/12958_2003_125_MOESM5_ESM.pdf/9566174)

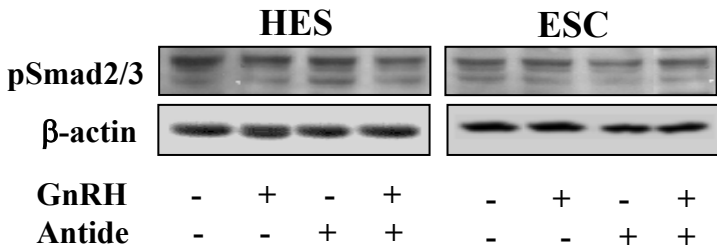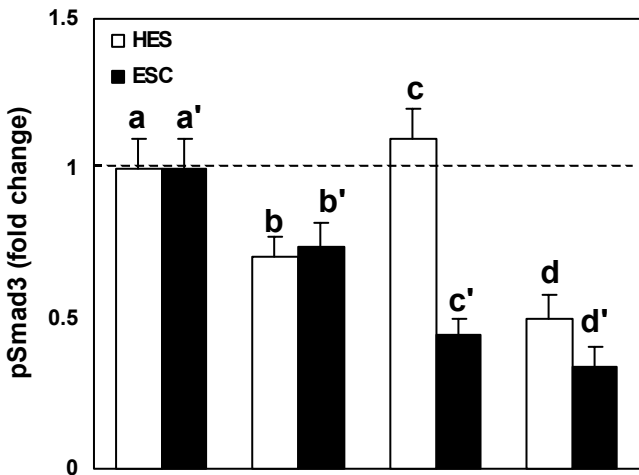

|        |   |   |   |   |
|--------|---|---|---|---|
| GnRH   | - | + | - | + |
| Antide | - | - | + | + |

Supplement: MOESM5 [file 9566174]
